# Supplementary material for: Small secreted proteins from the necrotrophic conifer pathogen Heterobasidion annosum s.l. (HaSSPs) induce cell death in Nicotiana benthamiana
Source: PubMed Central journal article supplement (PMC5554239; doi:10.1038/s41598-017-08010-0), 2017-08-11
Supplement: 41598_2017_8010_MOESM1_ESM.pdf [file 41598_2017_8010_MOESM1_ESM.pdf]

**Small secreted proteins from the necrotrophic conifer pathogen *Heterobasidion annosum* s.l. (HaSSPs)**  
**induce cell death in *Nicotiana benthamiana***  
*Tommaso Raffaello & Fred O. Asiegbu*

**Supplementary Figure 1: Statistical analysis of the microarray sample data clustering by multiscale bootstrap resampling.**

Microarray data were retrieved from the Gene Expression Omnibus (GEO) database (<https://www.ncbi.nlm.nih.gov/geo/>). Raw data were normalized with the statistical program R<sup>48</sup> using the *oligo* package<sup>49</sup>. The statistic *p-values*, “au” (approximately unbiased) and “bp” (bootstrap probability), for the sample clusters were calculated in R using the *pvclust* package in order to assess the statistical significance of the cluster analysis by multiscale bootstrap resampling<sup>51</sup>.

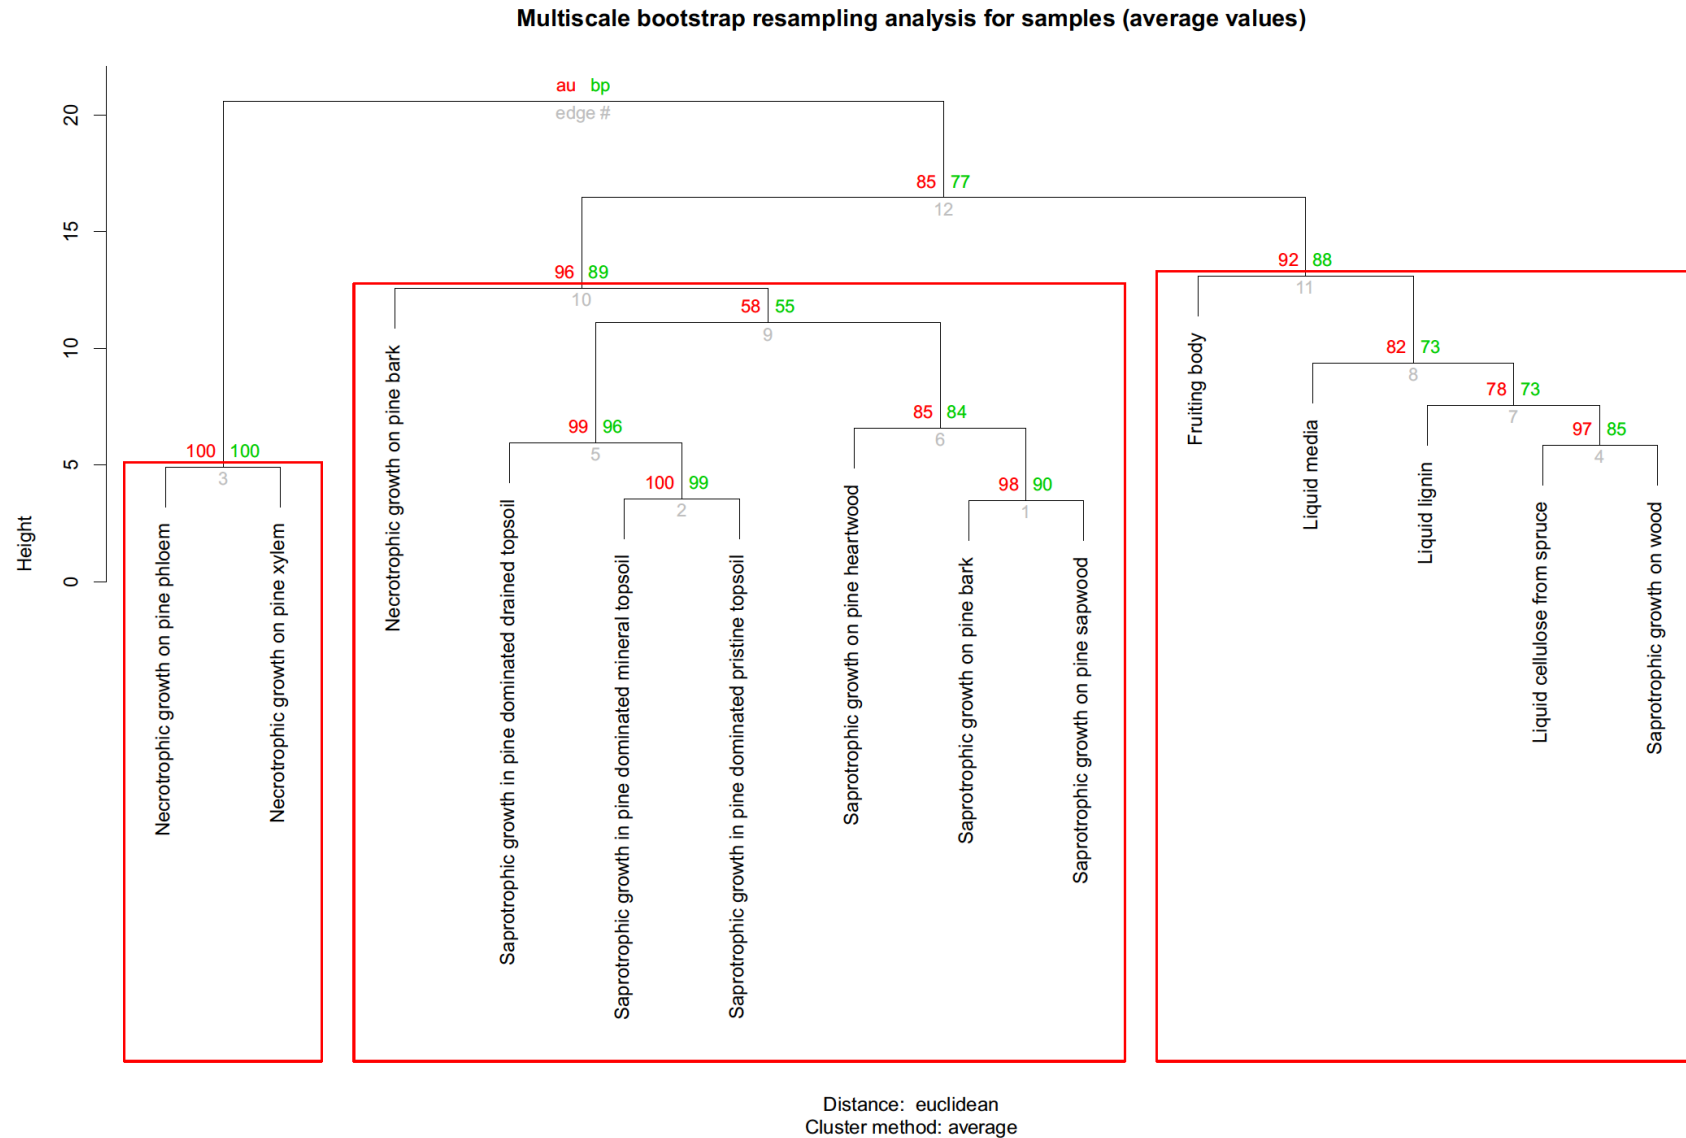

**Supplementary Figure 2: Statistical analysis of the microarray gene data clustering by multiscale bootstrap resampling.**

Microarray data was retrieved from the Gene Expression Omnibus database (GEO) (<https://www.ncbi.nlm.nih.gov/geo/>). Raw data was normalized with the statistical program R<sup>48</sup> using the *oligo* package<sup>49</sup>. The statistic *p-values*, “au” (approximately unbiased) and “bp” (bootstrap probability), for the gene clusters were calculated in R using the *pvclust* package in order to assess the statistical significance of the cluster analysis by multiscale bootstrap resampling<sup>51</sup>.

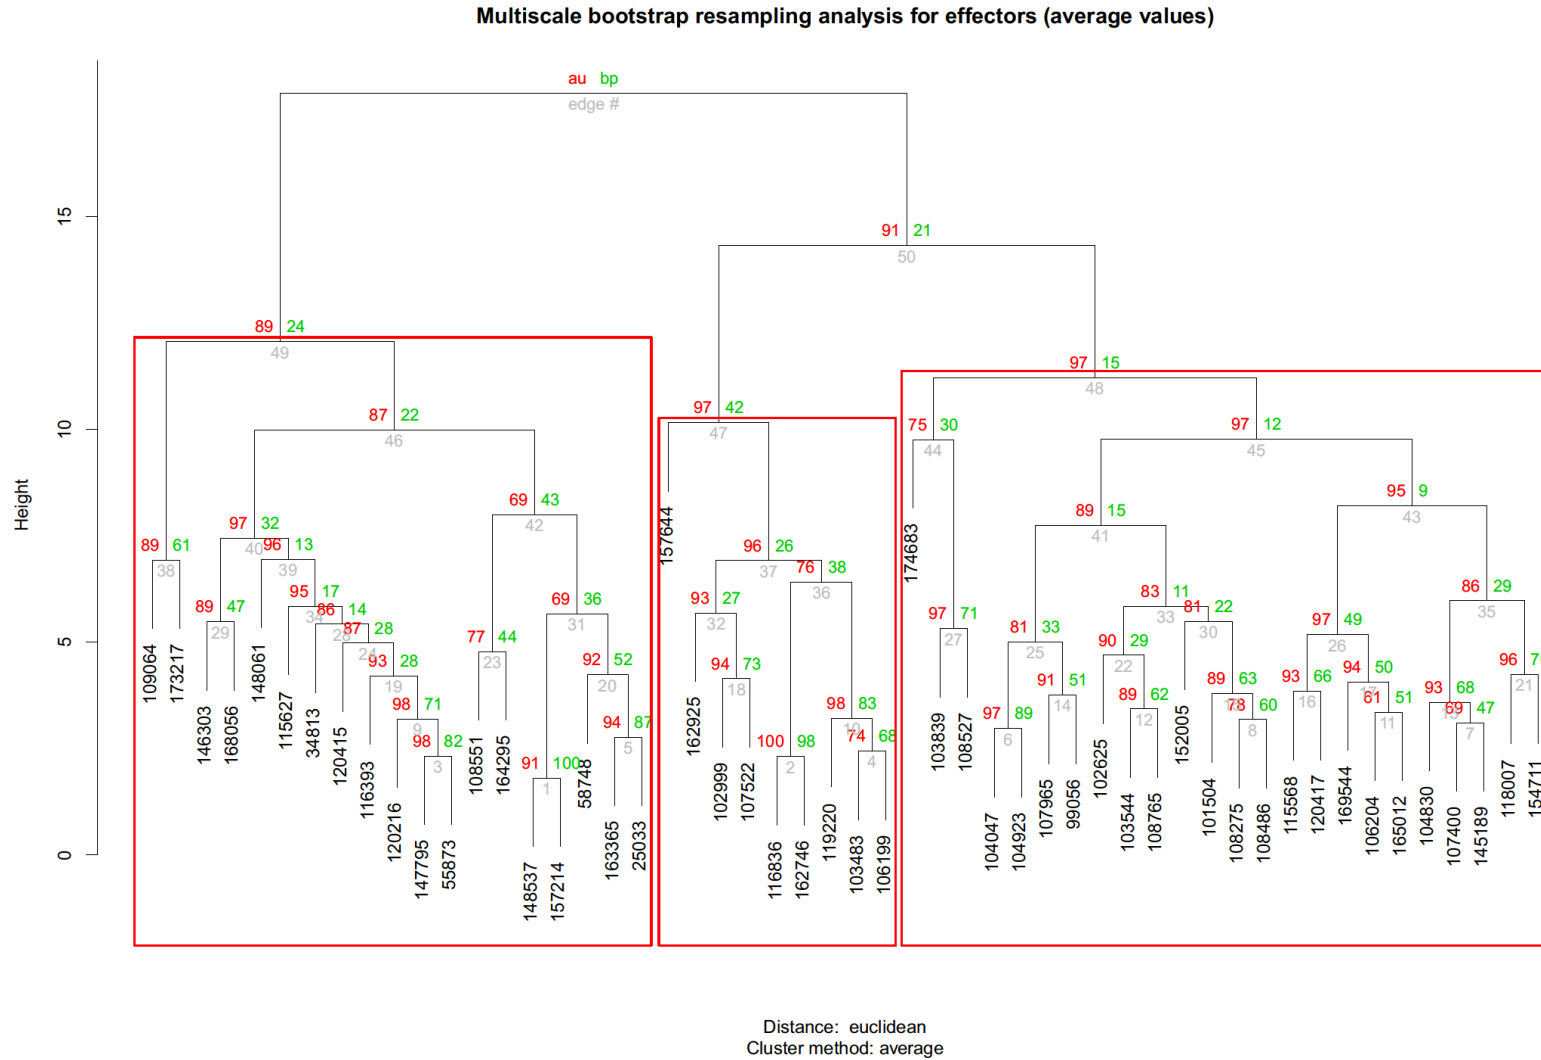

**Supplementary Figure 3: Comparison of HaSSP30 and HaSSP47 protein length.**

Protein ID (Hetan2.0): 391204

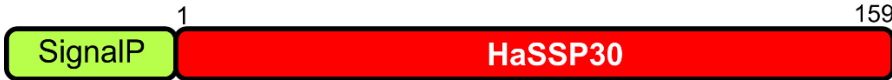

ProteinID (Hetan2.0): 447006

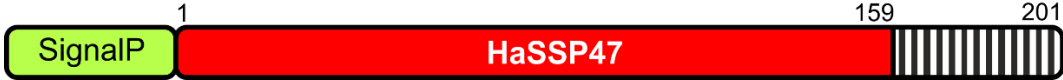

**Supplementary Table S1: List of the microarray samples analysed in this study from the Gene Expression Omnibus database (GEO).**

| Accession number in Gene Expression Omnibus (GEO)<br><a href="https://www.ncbi.nlm.nih.gov/geo/">https://www.ncbi.nlm.nih.gov/geo/</a> | Sample description <sup>1</sup>                                                              | Reference                     |
|----------------------------------------------------------------------------------------------------------------------------------------|----------------------------------------------------------------------------------------------|-------------------------------|
| GSM748496                                                                                                                              | necrotic bark of pines inoculated with <i>Heterobasidion irregulare</i> 1                    | (Olson, Aerts et al. 2012)    |
| GSM748497                                                                                                                              | necrotic bark of pines inoculated with <i>Heterobasidion irregulare</i> 2                    | (Olson, Aerts et al. 2012)    |
| GSM748498                                                                                                                              | necrotic bark of pines inoculated with <i>Heterobasidion irregulare</i> 3                    | (Olson, Aerts et al. 2012)    |
| GSM748499                                                                                                                              | <i>Heterobasidion irregulare</i> grown in liquid medium amended with cellulose from Spruce 1 | (Olson, Aerts et al. 2012)    |
| GSM748500                                                                                                                              | <i>Heterobasidion irregulare</i> grown in liquid medium amended with cellulose from Spruce 2 | (Olson, Aerts et al. 2012)    |
| GSM748501                                                                                                                              | <i>Heterobasidion irregulare</i> fruiting bodies collected in California 1                   | (Olson, Aerts et al. 2012)    |
| GSM748502                                                                                                                              | <i>Heterobasidion irregulare</i> fruiting bodies collected in California 2                   | (Olson, Aerts et al. 2012)    |
| GSM748503                                                                                                                              | <i>Heterobasidion irregulare</i> fruiting bodies collected in California 3                   | (Olson, Aerts et al. 2012)    |
| GSM748504                                                                                                                              | <i>Heterobasidion irregulare</i> fruiting bodies collected in California 4                   | (Olson, Aerts et al. 2012)    |
| GSM748505                                                                                                                              | <i>H. irregulare</i> grown on wood shavings from pine 1                                      | (Olson, Aerts et al. 2012)    |
| GSM748506                                                                                                                              | <i>H. irregulare</i> grown on wood shavings from pine 2                                      | (Olson, Aerts et al. 2012)    |
| GSM748559                                                                                                                              | <i>H. irregulare</i> grown on wood shavings from pine 3                                      | (Olson, Aerts et al. 2012)    |
| GSM748560                                                                                                                              | <i>H. irregulare</i> grown on wood shavings from pine 4                                      | (Olson, Aerts et al. 2012)    |
| GSM748572                                                                                                                              | <i>Heterobasidion irregulare</i> grown in liquid medium amended with lignin 1                | (Olson, Aerts et al. 2012)    |
| GSM748573                                                                                                                              | <i>Heterobasidion irregulare</i> grown in liquid medium amended with lignin 2                | (Olson, Aerts et al. 2012)    |
| GSM979475                                                                                                                              | <i>H. annosum</i> grown on pulverized Scots pine bark shavings, rep1                         | (Raffaello, Chen et al. 2014) |
| GSM979476                                                                                                                              | <i>H. annosum</i> grown on pulverized Scots pine bark shavings, rep2                         | (Raffaello, Chen et al. 2014) |
| GSM979477                                                                                                                              | <i>H. annosum</i> grown on pulverized Scots pine bark shavings, rep3                         | (Raffaello, Chen et al. 2014) |
| GSM979481                                                                                                                              | <i>H. annosum</i> grown on liquid malt extract medium, rep1                                  | (Raffaello, Chen et al. 2014) |
| GSM979482                                                                                                                              | <i>H. annosum</i> grown on liquid malt extract medium, rep2                                  | (Raffaello, Chen et al. 2014) |
| GSM979483                                                                                                                              | <i>H. annosum</i> grown on liquid malt extract medium, rep3                                  | (Raffaello, Chen et al. 2014) |
| GSM979490                                                                                                                              | <i>H. annosum</i> grown on pulverized Scots pine heartwood shavings, rep1                    | (Raffaello, Chen et al. 2014) |
| GSM979492                                                                                                                              | <i>H. annosum</i> grown on pulverized Scots pine heartwood shavings, rep2                    | (Raffaello, Chen et al. 2014) |
| GSM979494                                                                                                                              | <i>H. annosum</i> grown on pulverized Scots pine heartwood shavings, rep3                    | (Raffaello, Chen et al. 2014) |
| GSM979515                                                                                                                              | Necrotic phloem of Scots pine infected with <i>H. annosum</i> , rep1                         | (Raffaello, Chen et al. 2014) |
| GSM979516                                                                                                                              | Necrotic phloem of Scots pine infected with <i>H. annosum</i> , rep2                         | (Raffaello, Chen et al. 2014) |
| GSM979517                                                                                                                              | Necrotic phloem of Scots pine infected with <i>H. annosum</i> , rep3                         | (Raffaello, Chen et al. 2014) |
| GSM979530                                                                                                                              | <i>H. annosum</i> grown on pulverized Scots pine sapwood shavings, rep1                      | (Raffaello, Chen et al. 2014) |

**Supplementary Table S1 (Continued)**

|                   |                                                                                      |                               |
|-------------------|--------------------------------------------------------------------------------------|-------------------------------|
| <b>GSM979531</b>  | H. annosum grown on pulverized Scots pine sapwood shavings, rep2                     | (Raffaello, Chen et al. 2014) |
| <b>GSM979532</b>  | H. annosum grown on pulverized Scots pine sapwood shavings, rep3                     | (Raffaello, Chen et al. 2014) |
| <b>GSM979536</b>  | Necrotic xylem of Scots pine infected with H. annosum, rep1                          | (Raffaello, Chen et al. 2014) |
| <b>GSM979537</b>  | Necrotic xylem of Scots pine infected with H. annosum, rep2                          | (Raffaello, Chen et al. 2014) |
| <b>GSM979538</b>  | Necrotic xylem of Scots pine infected with H. annosum, rep3                          | (Raffaello, Chen et al. 2014) |
| <b>GSM1333665</b> | H. annosum grown on Pine-dominant mineral forest topsoil (organic layer) 1           | Unpublished                   |
| <b>GSM1333666</b> | H. annosum grown on Pine-dominant mineral forest topsoil (organic layer) 2           | Unpublished                   |
| <b>GSM1333667</b> | H. annosum grown on Pine-dominant mineral forest topsoil (organic layer) 3           | Unpublished                   |
| <b>GSM1333668</b> | H. annosum grown on Pine-dominant pristine peatland forest topsoil (organic layer) 1 | Unpublished                   |
| <b>GSM1333669</b> | H. annosum grown on Pine-dominant pristine peatland forest topsoil (organic layer) 2 | Unpublished                   |
| <b>GSM1333670</b> | H. annosum grown on Pine-dominant pristine peatland forest topsoil (organic layer) 3 | Unpublished                   |
| <b>GSM1333671</b> | H. annosum grown on Pine-dominant drained peatland forest topsoil (organic layer) 1  | Unpublished                   |
| <b>GSM1333672</b> | H. annosum grown on Pine-dominant drained peatland forest topsoil (organic layer) 2  | Unpublished                   |
| <b>GSM1333673</b> | H. annosum grown on Pine-dominant drained peatland forest topsoil (organic layer) 3  | Unpublished                   |

<sup>1</sup>Biological replicates are indicated by the Arabic number at the end of the description.

**Supplementary Table S2: List of primers used in this study.**

| Gene   | Sequence used to design PCR and qPCR primers                                                                                                                                                                                                                                                                                                                                                                                                                                                                                                                                                                                                                                                                                                                                                                                               | Forward primer            | Reverse primer            | Amplicon length | E    | Reference          |
|--------|--------------------------------------------------------------------------------------------------------------------------------------------------------------------------------------------------------------------------------------------------------------------------------------------------------------------------------------------------------------------------------------------------------------------------------------------------------------------------------------------------------------------------------------------------------------------------------------------------------------------------------------------------------------------------------------------------------------------------------------------------------------------------------------------------------------------------------------------|---------------------------|---------------------------|-----------------|------|--------------------|
| PR1a   | NA                                                                                                                                                                                                                                                                                                                                                                                                                                                                                                                                                                                                                                                                                                                                                                                                                                         | CGACCAGGTAGCAGCCTATG      | TCTCAACAGCCTTAGCAGCC      | NA              | 2    | Qi M, et al., 2016 |
| PR2    | NA                                                                                                                                                                                                                                                                                                                                                                                                                                                                                                                                                                                                                                                                                                                                                                                                                                         | GGGCTGTTAATTTGCAGTATCC    | GGTTTATAACATCTTGGTCTGATGG | NA              | 2    | Qi M, et al., 2016 |
| WRKY12 | NA                                                                                                                                                                                                                                                                                                                                                                                                                                                                                                                                                                                                                                                                                                                                                                                                                                         | CTCATCAGCTAGTTCATTTGATGC  | AGCTCGGTCTTTGTTCTAAAAGC   | NA              | 2    | Qi M, et al., 2016 |
| PI1    | NA                                                                                                                                                                                                                                                                                                                                                                                                                                                                                                                                                                                                                                                                                                                                                                                                                                         | CTTCAAAGACTATGGTGAAGTTTGC | CAGACTGAGACACATCAAGTTGC   | NA              | 2    | Qi M, et al., 2016 |
| PR3    | >PR-3<br>ATGGAGTTTTCTGGATCACCCTGGTATTGTTTTGTTGTGTGTTTTCTGTCT<br>TAACAGGGAGCTTGGCACAAGGCATTGGTTCTATTGTGACGAGTGACTTGTT<br>AACGAGATGCTGAAGAATAGGAATGACGTTAGATGTCCTGCCAATGGCTTCTA<br>CACTTATGATGCATTCATAGCTGCTGCCAATCCTTTCTGGTTTTGGAACACT<br>GGTGATGATACTGCCGTAGGAAAGAAATGCTGCCTTTTCGGTCAAACCTCT<br>CATGAAACTACTGGTGGTTCCCTGAGTGCAGAACCATTTACAGGAGGATATTG<br>CTTTGTTCCGGCAAATGACCAGAGTGAAAGATATTATGGTAGAGGACCCATCC<br>AATTGACAAACCGAAATAATTATGAGAAAGCTGGAAGTCAATTCACAAAGAC<br>CTAGTTAACAAACCTGATTTAGTAGCCACAGATGCTACTATATCATTCAAACA<br>GCTATATGGTTTTGGATGACAGCACAGGACAACAAGCCATCTCCACGACGT<br>TATCATCGGTAGTTGGACTCCGTCTGCCGCGGATCAGGCGGCGAATCGAGTAC<br>CAGGTTACGGTGAATTACCAACATCATTAAACGGTGGAAATGAATGTGGCATG<br>GGTCGAAATGACGCAGTGAAGATCGAATTGGATACTACAGGAGGTATTGTG<br>GAATGTTAAATGTTGCTCCTGGGAAAACCTGGACTGTTACAACCAAAGGAAC<br>TTCGCCCAGGGCTAG | TGCCTTTTCCGGTCAAACCT      | TGTAATGGTTCTGCACTCAGG     | 64              | 1.87 | This study         |
| PR4a   | >PR-4a<br>ATGGAGAGAGTAAATAACTATAAGTTGTGTATGGAATGTTTATCATGAG<br>CATGATGGTGCAATGGCGCGGCACAGAGCGCTACAAACGTGAGATCAACG<br>TATCATTTATAACAACCCACAGAACATTAACCTGGGATTTGAGAGCAGCAAGTGC<br>TTTCTGCACTACTGGGATGCCGACAAGCCTCACGTGCGCTCAGAAATATG<br>GCTGGACTGCTTCTGTGATGCTGCTGGACCTCAAGGCCAAGATCCTGTGGT<br>AGATGCTTGAGGGTGACGAACACAGGAACGGAACCTCAAACAACAGTGAGAA<br>TAGTAGATCAATGCAGAAATGGAGGGCTTGATTTGGATGTAACAGCTCTTAAAC<br>CAATTGGACACAAATGGAGTGGGCTATCAGCAAGGCCACCTTATTGTCAACTA<br>TGAATTTATCAACTGCGATGACTAA                                                                                                                                                                                                                                                                                                                                          | CAACCCACAGAACATTAACCTGG   | TTGTCGGCATCCCAAGTAGT      | 69              | 1.9  | This study         |
| PR5    | >PR-5<br>ATGAACCTCCTCAAAGCTTCCCCTTTTTGCCTTCTTTGTTTTGGCCAATACTT<br>TGTAGCTGTTACTCATGCTGCAACTTTTGACATTATCAACCAATGCACCTACAC<br>AGTCTGGGCCCGCGCCTCTCCAGGTGGAGGCAGGCAGCTCAACTCGGGCCAA<br>TCTTGGAGCATTAACTGAACCCAGGAACAGTCCAGGCTCGCATATGGGGCC<br>GAACCAACTGCAACTTCGATGGCAGTGGCCGAGGTAATTGTGAGACTGGAGA<br>CTGTAACGGGATGCTAGAGTGTCAAGGCTATGGTAAACCCCAACACTTTAG<br>CTGAATTTGCACTTAATCAGCCTAATCAGGACTTCGTCGACATCTCTTTGTTGA<br>TGATTTAAACATCCCATGGAATTCAGCCCACTAATGGCGGGTCCCGTAACC<br>TTAGATGCGCAGCCCTATTAACGAGCAATGCCAGCACAGTTGAAAACACAA<br>GGTGGATGTAACAACCCATGACTGTGATAAAAACCAATGAATATTGTTGTAC<br>AAATGGGCCTGGATCATGTGGCCTACTGATTTGTCGAGATTTTTAAAGGAAA<br>GATGCCCAGATGCTTATAGCTATCCACAGGATGATCCAAGTGTGTTTACTT<br>GTCCTCTGTACCAATTACAGGGTTGTCTTCTGCCCTTGA                                                                                           | ATGCGCAGCCCTATTAAC        | TGGGTTGTTACATCCACCTTG     | 67              | 1.88 | This study         |

**Supplementary Table S2 (Continued)**

| Gene            | Sequence used to design PCR and qPCR primers                                                                                                                                                                                                                                                                                                                                                                                                                                                                                                                                                                                                                                                                                                                                                                                                                                                                                                                                                                                                                                                                                                                                                                                                                                                                                                                                                                               | Forward primer        | Reverse primer       | Amplicon length | E    | Reference  |
|-----------------|----------------------------------------------------------------------------------------------------------------------------------------------------------------------------------------------------------------------------------------------------------------------------------------------------------------------------------------------------------------------------------------------------------------------------------------------------------------------------------------------------------------------------------------------------------------------------------------------------------------------------------------------------------------------------------------------------------------------------------------------------------------------------------------------------------------------------------------------------------------------------------------------------------------------------------------------------------------------------------------------------------------------------------------------------------------------------------------------------------------------------------------------------------------------------------------------------------------------------------------------------------------------------------------------------------------------------------------------------------------------------------------------------------------------------|-----------------------|----------------------|-----------------|------|------------|
| ERF1            | >ERF1<br>ATGGGCTCACCACAAGAGAATTGCACTACACTTGATTAATTAGGCAACATCTTCTTGATGATAATGTTTTATGG<br>AACATTAATTGTCACCAACCAATTCTTTATCTCAAAGCTCCTCCTCTTGAATCTTTAAACTCCATTGCTTCTGAGC<br>TCAATAACGATAGTTTTCTCTTTGAACCAACTCTCAATTATGCCGACACAGCCAAAGTTCCAATCTGATATCTCA<br>ACCTTCTTTAAACAATCAAAAACAGAGTTCGACTGCTTTGAGTTGAGACAAAACCAACGTTAGCTGCTCGTA<br>TTAGTTCAAATCTCCGAAGCAAACAAGCTTCAACGAACGCAAGCCTTCTCTGAATATTGCTATACCCCTGAAGCA<br>GCAAGAGGTTGTCAGAAAGTGGGAATTTCCAACGAGAGCAAGAAGAAGCATTACCGAGGAGTTAGGCAACGG<br>CCGTGGGGGAAGTTCGCCGACAGAGATTCTGACCCGAACCGAAAGGGGACTCGGGTTTGGTTAGGAACCTTTG<br>ACACTGCCTTAGAGCGGCTAAGGCATATGATAGGCGCGCTTAAAGCTTAGAGGTAGCAAAGCAATAGTTAAT<br>TTCCCTCTCGAAGTTTCAAACCTTTAAGCAACAAGATAATGAGATTGACCTTTGATGAACCTCAAACAGGAAAAAG<br>GTGAGAGAAACAGAGAGTGAGGAGCAACTAGTTGTCGACAAAGGAAATGAAAAATTGAACAAGAAAGAGTCCCAA<br>CAGCTCCGTTAAACGCCGTCAAAGTTGGTGGCGATTGGGACAGTGGAAATGGGAAAGGGTATATTTGAGGTGCC<br>CCTCTATCACCATTATCTCCACATATGGCTTATTCTCAGCTTGCTATGATATAA                                                                                                                                                                                                                                                                                                                                                                                                                                                                  | GTTAACGCCGTCAAGTTGGT  | AGAGGGCGGCACCTCAAATA | 72              | 1.93 | This study |
| Endochitinase B | > Endochitinase B<br>ATGAGGCTTGTAAATTCACAGCTCTTCTCTCTACTATTTTCTCTCTCTATTGCTTCTGCCTCGGCAGAACAAATGT<br>GGTTTCGACGGCCGGAGGTGCGCGTTGTCCTCGGGTCTCTGCTGCAGCAAATTTGGTTGGTGGTAAACACCAA<br>TGAATATTGTCGCTTGGCAATTTGCCAGAGCCAGTGCCTGGTGGTCCACACCTACACCGCCACCCACCCCGG<br>TGGTGGGGACCTCGGCAGTATCATTCAAATTCATGTTGATCAGATGCTTAAAGCATCGCAACGATAATGCCTG<br>CGAAGGACATGGATTCTACAGTTACAATGCCTTTATCAATGCTGCTAGGTCTTTTCTGGCTTTGGTACCAGTGGC<br>GATACTACTGCCGAGGATGGGCAACAGCACCAGATGGTCCATATGCATGGGGTTATTGCTGGCTTAGAGAAGC<br>AGGTAGCCCGCGACTACTGTACACCAAGTGGTCAAGTGGCTTGTCTCTGCTGGTCCGAAATATTTCCGACGAG<br>GCCCCATCAAATTTACACAATAAAGTACCGACCTTGTGGAAGAGCCATAGGAGTGGACCTCTAAACAATC<br>CTGATTTAGTGGCCACAGATCCAGTTATCTCTTTAAGTCAAGTCTCTGGTTTTGGATGACCCCTCAATACAAAA<br>ACCTTCTGCCAGATGTCATCATCGAAGATGGCAACCATCGTCTGCTGACCGCGCAGCAATCGTCTCCCTGG<br>ATTTGGTGTATCAGCAACATCATCAACGGTGGCTGGAATGTGGTATGGCACTGACTCAAGGGTCCAGGATC<br>GCGTTGGGTTTTACAGAAAGTATTGCAATTTCTGGAGTTAGTCTGGTGACAATCTTGATTGCGGCAACCAGA<br>GGTCTTTTGAACCGACTTTTAGTCGATACTATGTA                                                                                                                                                                                                                                                                                                                                                                                                          | GCCTTTATCAATGCTGCTAGG | ATCCTCGGGCAGTAGTATCG | 67              | 1.88 | This study |
| EF1a            | >EF1a<br>ATGGGTAAAGAAAAGTTCACATCAACATTGGTTCATTGGCCACGTCGATTCTGGAAAGTCTACCACCACTGGT<br>CACTTGATCTACAAGCTTGGTGGTATTGACAAGCGTGTATTGAGAGGTTGAGAAGGAAGCCGCTGAGATGAA<br>CAAGAGGTCATTCAAGTATGCCTGGGTGCTTGAAGCTTAAAGGCTGAACGTGAGCGGGTATCACCATTGATA<br>TTGCCTTGTGAAGTTTGAAGCACCACAAATACTACTGCACTGTGATTGATGCCCCCGACACAGGACTTTATCA<br>AGAACATGATCACTGGTACTTCCAGGCTGATTGTGCTGTTCTTATTATTGACTCCCACTGGTGGTTTTGAAGC<br>TGGTATTTCCAAGGATGGTCAAGCCGTAACACGCATTGCTTGTTCACCTTGGTGTCAAGCAAATGATTGCT<br>TGCTGCAACAAGATGGATGCTACCACCCCAAGTACTCAAGGCTAGGTATGATGAAATCGTCAAGGAAGTTTCT<br>TCCTACCTGAAGAAGTTGGTTACAACCTGACAAGATTCCCTCGTCCCATCTCTGGTTTTGAGGGAGACAATA<br>TGATTGAGAGGTTACCAACCTTACTGGTACAAGGGGCAACCCCTTGAAGGCTCTGACCAAGATTAATGAGC<br>CCAAGAGGCCACAGACAAACCCCTACGCTCTTCACTTCAAGGACGTTTACAAGATTGGTGGTATTGGTACCGTCC<br>CCGTTGGTCTGTTGAAACTGGTGTCTCAAGCCTGGTATGGTTGTGACCTTTGGGCTACTGGTCTGACAACCTG<br>AAGTCAAGTCTGTAGAGATGCACCACGAAGCTCTCCTGGAGGCACTCCCGGTGACAATGTTGGGTTCAATGTTA<br>AGAAATGTTGCTGTTAAGGATCTCAAGCCTGGTTATGTTGCTCAAATTCGAAGGATGACCCAGCCAAAGGGGCT<br>GCCAGTTTCACTCCAGGTCATCATGAACCATCCTGGTCAAGTTGGAAATGGATGACCAAGTCTTGGTACT<br>GCCACACTTCCACATTTGCTGTCAAGTTGCTGAGATCTTGAACCAAGATTGACAGACGTTCTGGTAAAGAACTTG<br>AGAAGGAGCCTAAGTTCTGAAGAATGGTATGCTGGTATGGTAAAGATGATGCCAGCAAGCCTATGGTTGTG<br>GAGACCTTGGCCGAGTACCCACCAATTGGTGGTTTTGCTGTGAGGACATGCGTCAAGTCTGTTGGTGTG<br>ATCAAGAGTGTGACAAGAAGGACCAACTGGCGCAAGGTACCAAAGCTGCTCAGAAGAAGTGA | CTCCTTGAGGCTCTTGACCA  | ACGTAGGGGTTTGTCTGTGG | 60              | 1.91 | This study |



**Supplementary Table S2 (Continued)**

| Gene  | Sequence used to design PCR and qPCR primers                                                                                                                                                                                                                                                                                                                                                                                                                                                                                                                                                                                                                                                                                                                                                                                                                                                                                                                                                                                                                                                                                                                                                                                                                                                                                                                                                                                                                                | Forward primer       | Reverse primer       | Amplicon length | E    | Reference  |
|-------|-----------------------------------------------------------------------------------------------------------------------------------------------------------------------------------------------------------------------------------------------------------------------------------------------------------------------------------------------------------------------------------------------------------------------------------------------------------------------------------------------------------------------------------------------------------------------------------------------------------------------------------------------------------------------------------------------------------------------------------------------------------------------------------------------------------------------------------------------------------------------------------------------------------------------------------------------------------------------------------------------------------------------------------------------------------------------------------------------------------------------------------------------------------------------------------------------------------------------------------------------------------------------------------------------------------------------------------------------------------------------------------------------------------------------------------------------------------------------------|----------------------|----------------------|-----------------|------|------------|
| Actin | <p>&gt;Actin<br/>           ATGGCAGATGGAGAGGATATTCAGCCACTTGTCTGTGACAATGGAACAGGAATGGTCAAGGCTGG<br/>           GTTTGTGGAGATGATGCTCCACGAGCTGTATCCCTAGTATTGTTGGCCGGCCCCGCCATACTGG<br/>           TGTGATGGTGGGATGGGTCAGAAAAGATGCCTACGTGGGAGATGAAGCTCAATCAAAAAGAGGT<br/>           ATTTAACTCTTAAATACCCAATTGAGCATGGAATTGTCAGCAACTGGGATGATATGGAGAAGATC<br/>           TGGCATCATACTTTCTACAATGAGCTTCGTGTTGCGCCCGAGGAGCATCCAGTCTCCTAACTGAAG<br/>           CGCCTCTAACCCAAAGGCTAATCGTGAAAAGATGACCCAGATTATGTTTGAGACTTTTAATACCCC<br/>           AGCTATGTATGTTGCTATTCAGGCTGTCCTCTCACTGTATGCCAGTGGTCGTACCACCGGTATTGTG<br/>           TTGGACTCTGGTGTGGTGCAGCCACACCGTCCCAATTTATGAGGGGTATGCCCTCCACATGCC<br/>           ATTCTCCGCTTGACTTGGCAGGCCGTGACCTCACTGATAGTTTGATGAAGATCCTTACCGAGCGT<br/>           GGTTACATGTTACCACCTCAGCTGAGCAGGAAATTGTCAGGGACGTGAAAGAAAAGCTTGCTTA<br/>           CATAGCTCTTGACTATGAACAGGAACTCGAGACTGCAAAGACCAGCTCTTCTGTAGAGAAGAACTA<br/>           TGAGCTCCAGATGGGCAGGTGATCACCATTGGTGCTGAGCGTTTCCGTTGCTCCTGAGGTCCTTTT<br/>           CCAACCATCAATGATTGGAATGGAAGCTGCAGGAATCCACGAGACTACATACTCTATCATGAA<br/>           GTGTGATGTGGATATTAGAAAGGATCTTTATGGAACATTGTGCTCAGTGGTGGCTTACCATGTT<br/>           CCCGGGTATCGCTGATAGAATGAGCAAAGAAATTAAGCGCTTGCTCCTAGCAGCATGAAGATTAA<br/>           GGTGGTGGCCCCACCAGAGAGGAAATACAGTGTCTGGATTGGAGGCTCTATCTGGCTTCCCTCA<br/>           GCACCTCCAGCAGATGTGGATTGCTAAGGCAGAGTATGACGAATCTGGTCCGCTATTGTCCACA<br/>           GAAAGTGCTTCTGA</p> | TACCACCGGTATTGTGTTGG | TCATAAATTGGGACGGTGTG | 60              | 1.82 | This study |
